# Supplementary material for: Characterization of Sinomonas gamaensis sp. nov., a Novel Soil Bacterium with Antifungal Activity against Exserohilum turcicum
Source: PubMed Central journal article supplement (PMC6617354; doi:10.3390/microorganisms7060170), 2019-06-08
Supplement: microorganisms-07-00170-s001.pdf [file microorganisms-07-00170-s001.pdf]

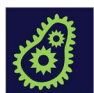

Supplementary Materials

# Characterization of *Sinomonas gamaensis* sp. nov., a Novel Soil Bacterium with Antifungal Activity against *Exserohilum turcicum*

Yansong Fu <sup>1</sup>, Rui Yan <sup>1</sup>, Dongli Liu <sup>1</sup>, Junwei Zhao <sup>1</sup>, Jia Song <sup>1</sup>, Xiangjing Wang <sup>1</sup>, Lin Cui <sup>1</sup>, Ji Zhang <sup>1,\*</sup> and Wensheng Xiang <sup>1,2,\*</sup>

<sup>1</sup> Heilongjiang Provincial Key Laboratory of Agricultural Microbiology, Northeast Agricultural University, Harbin 150030, China; [yansongfu1@163.com](mailto:yansongfu1@163.com) (Y.F.); [15546073308@163.com](mailto:15546073308@163.com) (Y.R.); [17862181612@163.com](mailto:17862181612@163.com) (D.L.); [guyan2080@126.com](mailto:guyan2080@126.com) (J.Z.); [songjia-hit@hotmail.com](mailto:songjia-hit@hotmail.com) (J.S.); [wangneau2013@163.com](mailto:wangneau2013@163.com) (X.W.); [15663843306@163.com](mailto:15663843306@163.com) (L.C.)

<sup>2</sup> State Key Laboratory for Biology of Plant Diseases and Insect Pests, Institute of Plant Protection, Chinese Academy of Agricultural Sciences, Beijing 100193, China

\* Correspondence: [zhangji@neau.edu.cn](mailto:zhangji@neau.edu.cn) (J.Z.); [xiangwensheng@neau.edu.cn](mailto:xiangwensheng@neau.edu.cn) (W.X.)

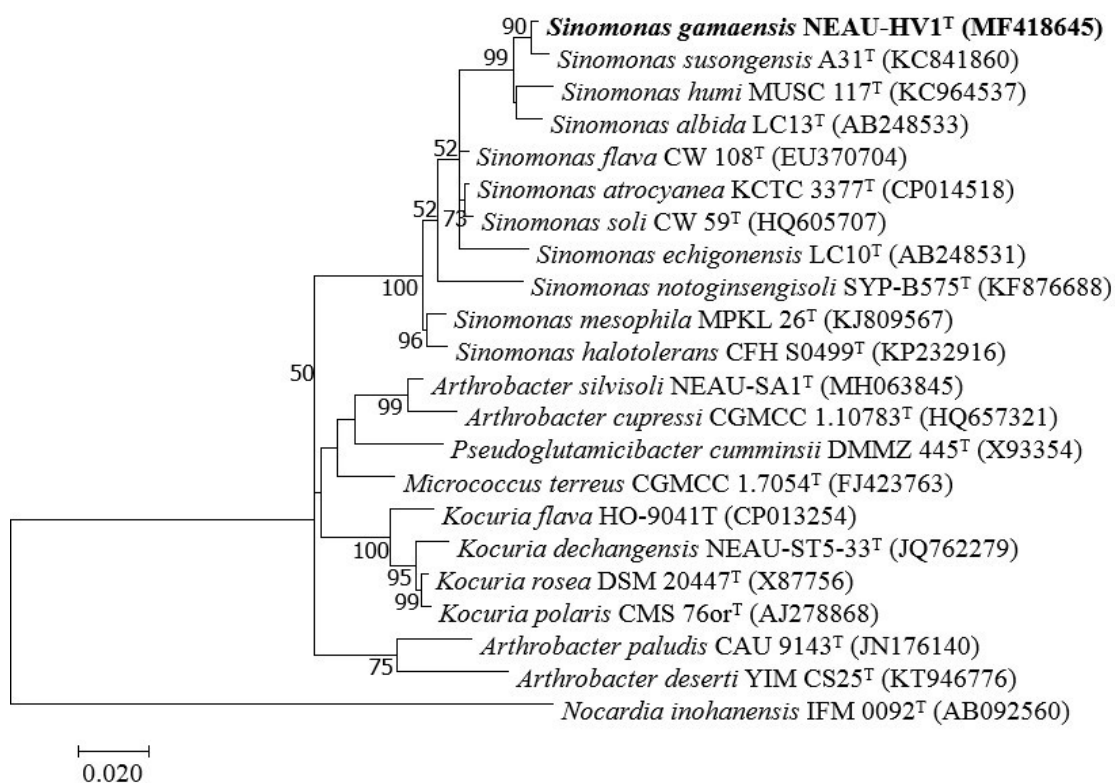

**Figure S1.** Maximum likelihood tree based on 16S rRNA gene sequences showing relationship between strain NEAU-HV1<sup>T</sup> and related taxa. Only bootstrap values above 50% (percentages of 1000 replications) are indicated. Bar, 0.02 nucleotide substitutions per site.

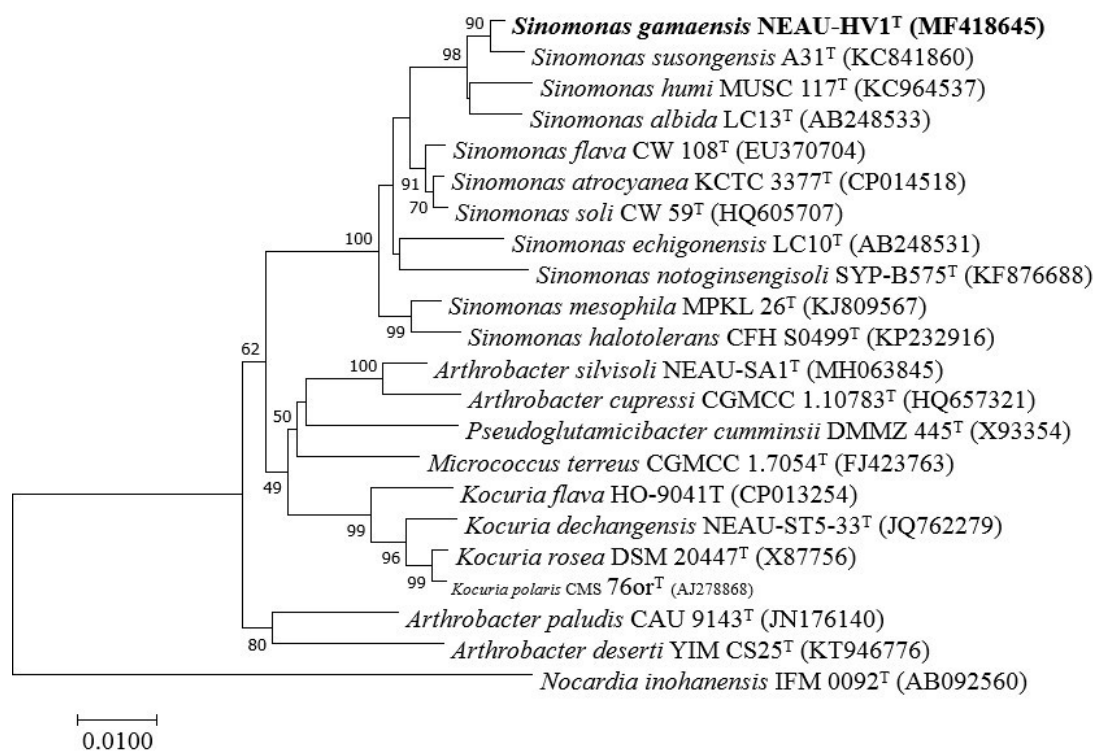

**Figure S2.** Minimum evolution tree based on 16S rRNA gene sequences showing relationship between strain NEAU-HV1<sup>T</sup> and related taxa. Only bootstrap values above 50% (percentages of 1000 replications) are indicated.

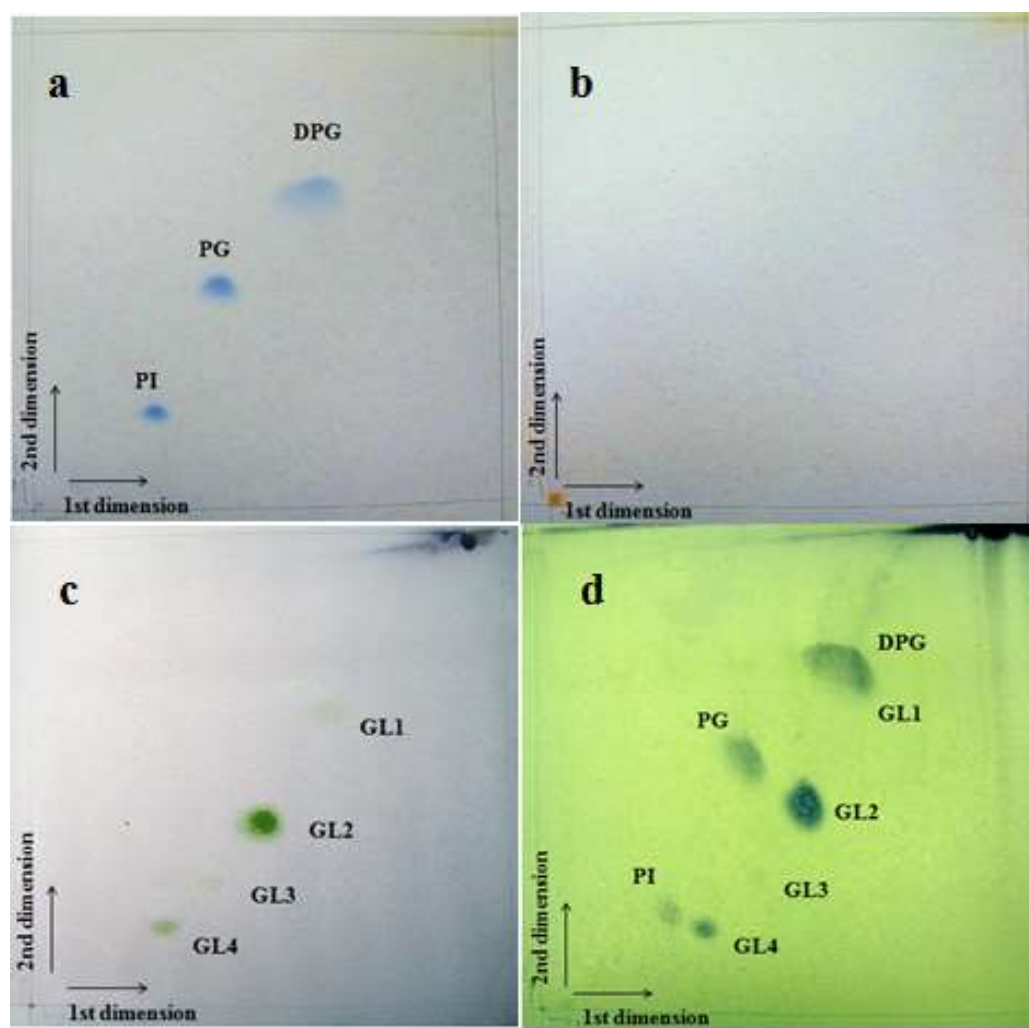

**Figure S3.** The polar lipids of strain NEAU-HV1<sup>T</sup> after two-dimensional TLC and sprayed with molybdophosphoric acid. (a) Using molybdenum blue reagent; (b) using ninhydrin reagent; (c) using anisaldehyde reagent, (d) using molybdophosphoric acid reagent. Diphosphatidylglycerol (DPG), phosphatidylglycerol (PG), phosphatidylinositol (PI) and glycolipids 1–4 (GL1–4).

**Table S1.** Differential characteristics between strain NEAU-HV1<sup>T</sup> and the closely related members of the genus *Sinomonas* in API tests.

| Characteristic                     | NEAU-HV1 <sup>T</sup> | <i>S. susongensis</i> A31 <sup>T</sup> | <i>S. albida</i> LC13 <sup>T</sup> | <i>S. humi</i> MUSC 117 <sup>T</sup> |
|------------------------------------|-----------------------|----------------------------------------|------------------------------------|--------------------------------------|
| Acid production from (API 50CH)    |                       |                                        |                                    |                                      |
| D-arabinose                        | –                     | +                                      | –                                  | –                                    |
| L-arabinose                        | –                     | +                                      | +                                  | –                                    |
| D-ribose                           | –                     | +                                      | +                                  | –                                    |
| D-xylose                           | –                     | +                                      | +                                  | –                                    |
| D-galactose                        | –                     | +                                      | +                                  | –                                    |
| D-fructose                         | +                     | –                                      | –                                  | +                                    |
| D-mannose                          | –                     | +                                      | +                                  | +                                    |
| L-rhamnose                         | –                     | +                                      | +                                  | –                                    |
| D-sorbitol                         | –                     | +                                      | –                                  | –                                    |
| Methyl $\alpha$ -D-mannopyranoside | –                     | –                                      | +                                  | –                                    |
| N-Acetylglucosamine                | –                     | +                                      | +                                  | –                                    |
| Arbutin                            | –                     | +                                      | +                                  | –                                    |
| Salicin                            | –                     | +                                      | +                                  | –                                    |
| D-Cellobiose                       | –                     | +                                      | +                                  | –                                    |
| D-Maltose                          | –                     | +                                      | +                                  | –                                    |
| D-Lactose                          | –                     | –                                      | +                                  | –                                    |

|                                            |   |   |   |   |
|--------------------------------------------|---|---|---|---|
| Trehalose                                  | – | – | + | – |
| D-glucose                                  | – | + | + | + |
| D-Turanose                                 | + | – | – | + |
| D-Tagatose                                 | – | + | + | – |
| L-Fucose                                   | – | – | + | – |
| Biochemical characteristics (API 20NE)     |   |   |   |   |
| Nitrate reduction                          | + | – | – | + |
| Indole production                          | + | – | – | – |
| D-glucose fermentation                     | – | + | – | – |
| Arginine dihydrolase                       | + | – | – | + |
| Urease                                     | + | + | – | – |
| Enzyme activities (API ZYM)                |   |   |   |   |
| Esterase (C4)                              | + | – | + | + |
| Esterase lipase (C8)                       | + | – | – | + |
| Lipase (C14)                               | + | – | – | + |
| Valine arylamidase                         | + | – | – | + |
| Cysteine arylamidase                       | – | – | – | + |
| $\alpha$ -Galactosidase                    | + | + | – | + |
| <i>N</i> -Acetyl- $\beta$ -glucosaminidase | + | – | + | + |
| $\alpha$ -Mannosidase                      | + | + | – | + |

All data were obtained from this study. +, positive; –, negative. In API 50 CH test, all strains are positive for glycerol, D-mannitol, esculin ferric citrate; but negative for erytritol, L-xylose, D-adonitol, methyl  $\beta$ -D-xylopyranoside, L-sorbose, dulcitol, inositol, Methyl  $\alpha$ -D-glucopyranoside, amygdalin, D-Melibiose, D-Sucrose, inulin, D-melezitose, D-raffinose, starch, glycogen, xylitol, gentiobiose, D-lyxose, D-fucose, D-arabitol, L-arabitol, potassium gluconate, potassium 2-ketogluconate, potassium 5-ketogluconate. In API ZYM test, all strains are positive for leucine arylamidase, acid phosphatase, naphthol-AS-BI-phosphohydrolase,  $\beta$ -galactosidase,  $\alpha$ -glucosidase, and  $\beta$ -glucosidase; but negative for alkaline phosphatase, trypsin,  $\alpha$ -chymotrypsin,  $\beta$ -glucuronidase, and  $\beta$ -fucosidase.

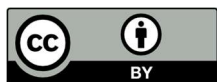

© 2019 by the authors. Submitted for possible open access publication under the terms and conditions of the Creative Commons Attribution (CC BY) license (<http://creativecommons.org/licenses/by/4.0/>).
